# Supplementary material for: Investigation of CO2 reaction with copper oxide nanoparticles for room temperature gas sensing
Source: Royal Society of Chemistry journal article supplement (doi:10.1039/c5ta09089j), 2016-01-01
Supplement: c5ta09089j1.pdf [file c5ta09089j1.pdf]

# Electronic Supplementary Information

## Investigation of CO<sub>2</sub> reaction with Copper Oxide Nanoparticles for Room Temperature Gas Sensing

*Nauman Bin Tanvir<sup>a,b</sup>, Olena Yurchenko<sup>a</sup>, Christoph Wilbertz<sup>c</sup> and Gerald Urban<sup>a,b</sup>*

<sup>a</sup>Freiburg Materials Research Center, University of Freiburg, Stefan-Meier-Straße 21, 79104  
Freiburg, Germany.

<sup>b</sup>Laboratory for Sensors, Department of Microsystems Engineering, University of Freiburg,  
Georges-Köhler-Allee 103, 79110 Freiburg, Germany.

<sup>c</sup>Micronas GmbH, Wafer process integration, Hans-Bunte-Straße 19, 79108 Freiburg,  
Germany.

**Section S1. Instrumentation**

**Section S2. Material Characterization**

**Section S3. Thermodynamical Investigations**

**Section S4. Gas Sensing Response and Recovery Times**

## Section S1. Instrumentation

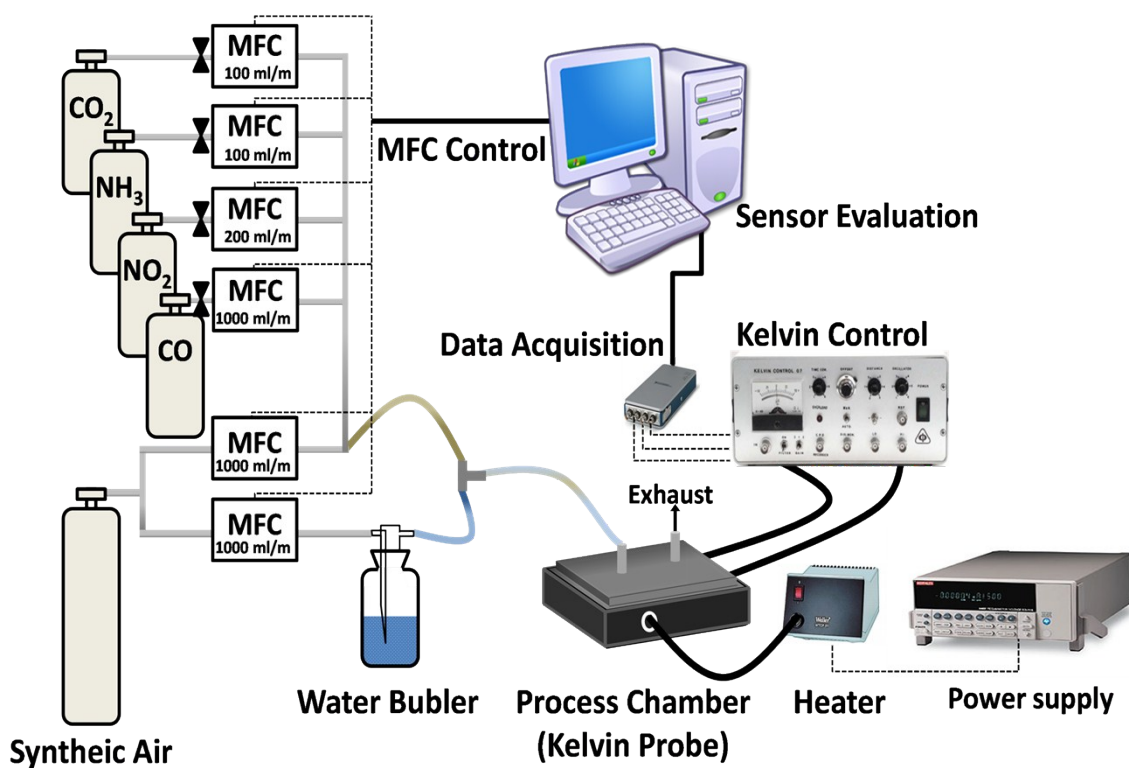

**Figure S1.** The schematic representation of developed Kelvin probe setup, which allow for the work function change measurement of gas sensitive materials under investigation.

## Section S2. Material Characterization

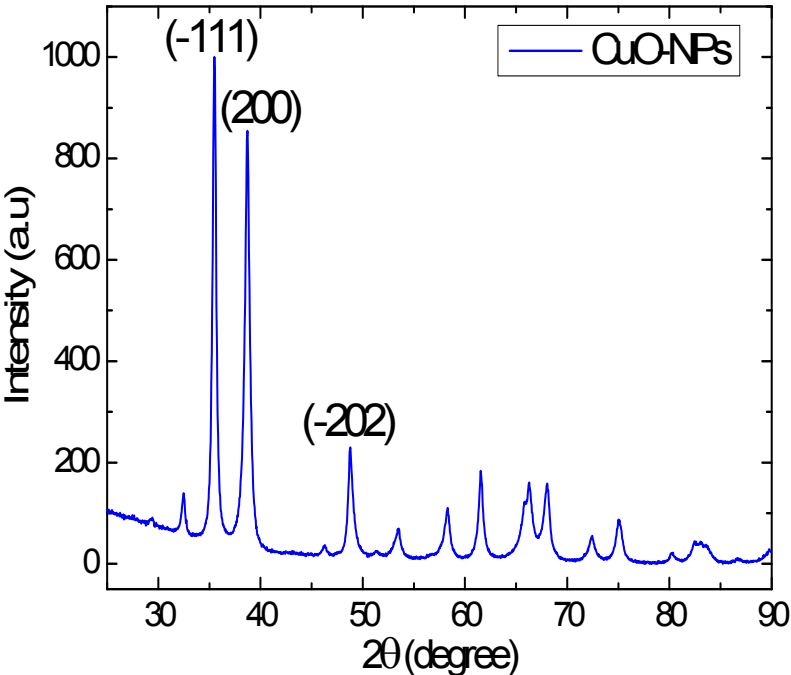

Figure S2. X-ray diffraction spectrum of copper oxide nano-powder.

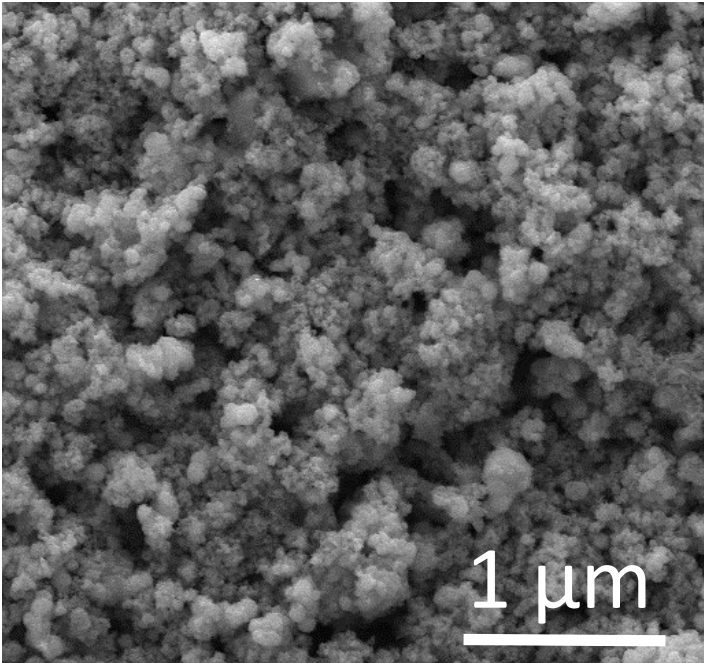

Figure S3. SEM-image of as deposited copper oxide nanoparticles layer

## Section S3. Thermodynamical Investigations

The Gibbs free energy change  $\Delta_R G$  for the reactions taking place at 298.15 K and partial pressures of participating gases differing from 1 bar can be calculated by the following equation <sup>1</sup>:

$$\Delta_R G = \Delta_R G^\circ + RT \ln Q \quad (\text{S1})$$

where  $\Delta_R G^\circ$  is the free energy change at standard conditions,  $R$  is the ideal gas constant and its value is 8.314 J/mol.K,  $T$  is the temperature in kelvin,  $Q$  is the reaction quotient and for the kind of reaction shown in eq. (S2) with gaseous components as reactants and products,  $Q$  is given by eq. (S3):

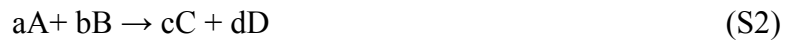

$$Q = \frac{(P_C)^c (P_D)^d}{(P_A)^a (P_B)^b} \quad (\text{S3})$$

where  $p_A, p_B, p_C, p_D$  are the partial pressures of the corresponding gases in bar.

Correspondingly,  $\Delta_R G^\circ$  for the reaction of malachite formation is given by:

$$\Delta_R G = \Delta_R G^\circ + RT \ln (P_{CO_2})^{-1} \quad (\text{S4})$$

At equilibrium,  $\Delta_R G$  is zero, and the equilibrium partial pressure of  $CO_2$  for the reaction of malachite formation can be calculated according to eq. S4 and S5:

$$\Delta_R G^\circ = -RT \ln K_{eq.} = -RT \ln (P_{CO_2})^{-1} \quad (\text{S4})$$

$$\log \frac{1}{p_{CO_2}} = -\frac{\Delta_R G^\circ}{2.303 RT} \quad (\text{S5})$$

where  $K_{eq.}$  is the equilibrium constant.

## Section S4. Gas Sensing Response and Recovery Times

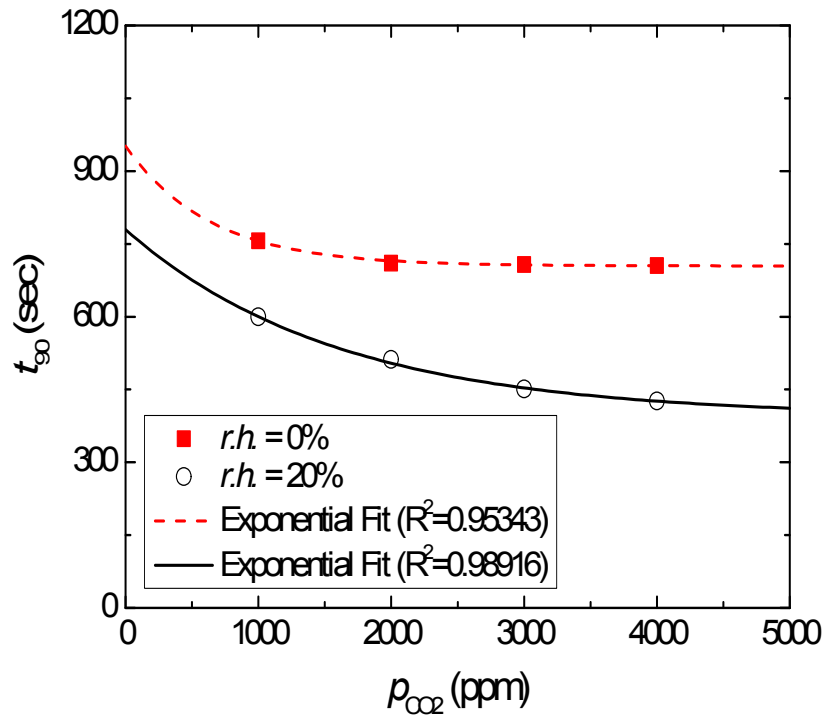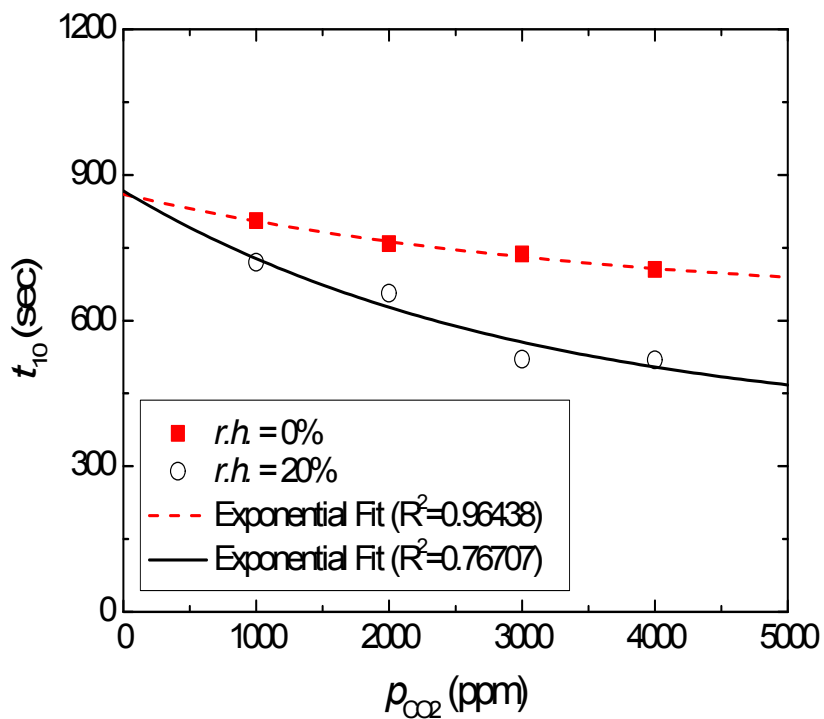

**Figure S4.** Dependence of response ( $t_{90}$ ) and recovery ( $t_{10}$ ) times on CO<sub>2</sub> concentration for dry ( $r.h.$  = 0%) and humid ( $r.h.$  = 20%) conditions at room temperature.
